# Supplementary material
Source: PubMed Central journal article supplement (PMC137526)
Supplement: pnas_232568699_1.pdf [file pnas_232568699_1.pdf]

**Table 2. Age distribution of fathers of sporadic achondroplasia cases (column 2) and the predicted cohort specific-age distribution based on the measured G1138A counts for USC (columns 3), LLNL (column 4), corrected USC (column 5), and corrected LLNL (column 6)**

| <b>AGE GROUP</b> | <b>ACHON. BIRTHS (%) (Ref. 1)</b> | <b>PREDICTED ACHON. BIRTHS (%) USC</b> | <b>PREDICTED ACHON. BIRTHS % LLNL</b> | <b>PREDICTED ACHON. BIRTHS % (CORRECTED) USC</b> | <b>PREDICTED ACHON. BIRTHS % (CORRECTED) LLNL</b> |
|------------------|-----------------------------------|----------------------------------------|---------------------------------------|--------------------------------------------------|---------------------------------------------------|
| 18-24            | 5.26                              | 18.06                                  | 13.37                                 | 16.53                                            | 3.70                                              |
| 25-29            | 13.16                             | 25.71                                  | 26.34                                 | 23.19                                            | 29.48                                             |
| 30-34            | 24.34                             | 24.57                                  | 21.95                                 | 26.25                                            | 22.38                                             |
| 35-39            | 18.42                             | 14.15                                  | 16.85                                 | 15.13                                            | 15.89                                             |
| 40-44            | 22.37                             | 8.55                                   | 10.18                                 | 9.24                                             | 13.86                                             |
| 45-49            | 9.87                              | 5.73                                   | 7.04                                  | 6.21                                             | 9.17                                              |
| 50-59            | 6.58                              | 3.23                                   | 4.28                                  | 3.45                                             | 5.52                                              |

The corrected predictions are based on substituting counts of <15 with 0 counts for

donors <40 years old and substituting counts of <15 with 0 counts for donors 40 and over.
